# Supplementary material for: Interface modification effects using a halide-free lead source for perovskite solar cells
Source: Royal Society of Chemistry journal article supplement (doi:10.1039/c7se00200a), 2017-01-01
Supplement: c7se00200a1.pdf [file c7se00200a1.pdf]

Supporting Information for

**Interface modification effect by halide-free lead source for perovskite solar cells**

Li Xiao<sup>a</sup>, Jia Xu<sup>a,b</sup>, Jing Chen<sup>a</sup>, Jicheng Luan<sup>a</sup>, Yi Yang<sup>a</sup>, Bing Zhang<sup>a,b</sup>, Jianxi Yao<sup>a,b,\*</sup>, Songyuan Dai<sup>a,b,\*</sup>

1 Beijing Key Laboratory of Novel Thin Film Solar Cells, Renewable Energy School, North China Electric Power University, Beijing 102206, China

2 Beijing Key Laboratory of Energy Security and Clean Utilization, Renewable Energy School, North China Electric Power University, Beijing 102206, China

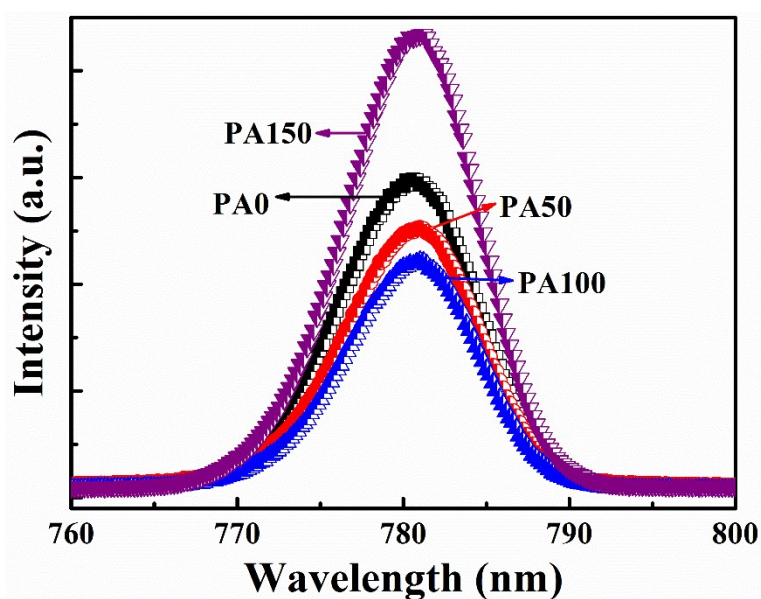

Figure S1. Steady state photoluminescence spectra of A/PA/CH<sub>3</sub>NH<sub>3</sub>PbI<sub>3</sub> samples of PA0, PA50, PA100 and PA150.

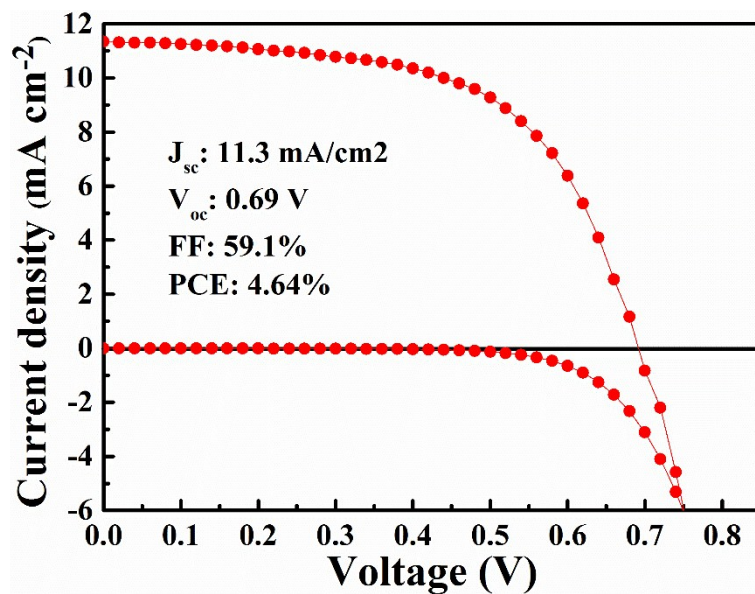

Figure S2. J-V curves of PSC based on A/PA+MAI/spiro-OMeTAD/Au.

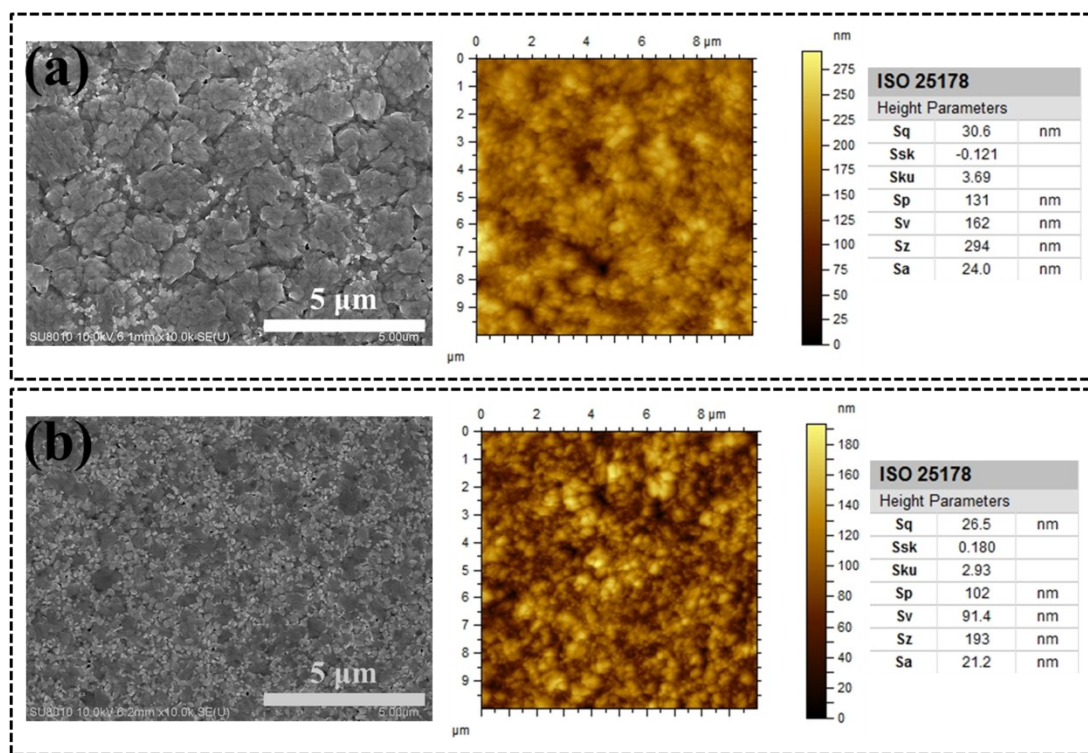

Figure S3. SEM and AFM results of A/PA/CH<sub>3</sub>NH<sub>3</sub>PbI<sub>3</sub> samples with (a) PA0 and (b) PA100.

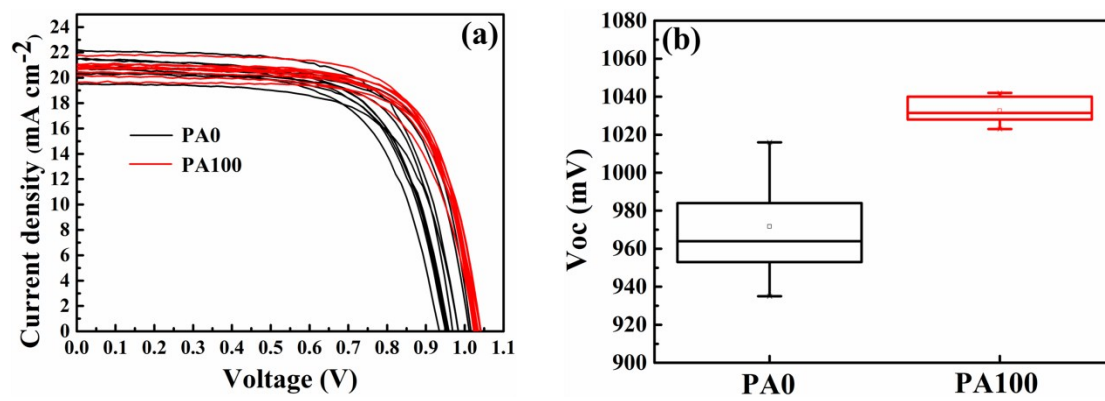

Figure S4. (a) J-V curves of 10 individual PSCs with/without PA and (b) box plots of their  $V_{oc}$ .
